# Supplementary material for: Hypothalamic AAV-BDNF gene therapy improves metabolic function and behavior in the Magel2-null mouse model of Prader-Willi syndrome
Source: PubMed Central journal article supplement — Mol Ther Methods Clin Dev. 2022 Sep 27;27:131–48. doi: 10.1016/j.omtm.2022.09.012 (PMC9573893; doi:10.1016/j.omtm.2022.09.012), 2022-09-27
Supplement: mmc1.pdf [file mmc1.pdf]

OMTM, Volume 27

## Supplemental information

**Hypothalamic AAV-BDNF gene therapy improves  
metabolic function and behavior in the *Mage12*-null  
mouse model of Prader-Willi syndrome**

**Nicholas J. Queen, Xunchang Zou, Jacqueline M. Anderson, Wei Huang, Bhavya Appana, Suraj Komatineni, Rachel Wevrick, and Lei Cao**

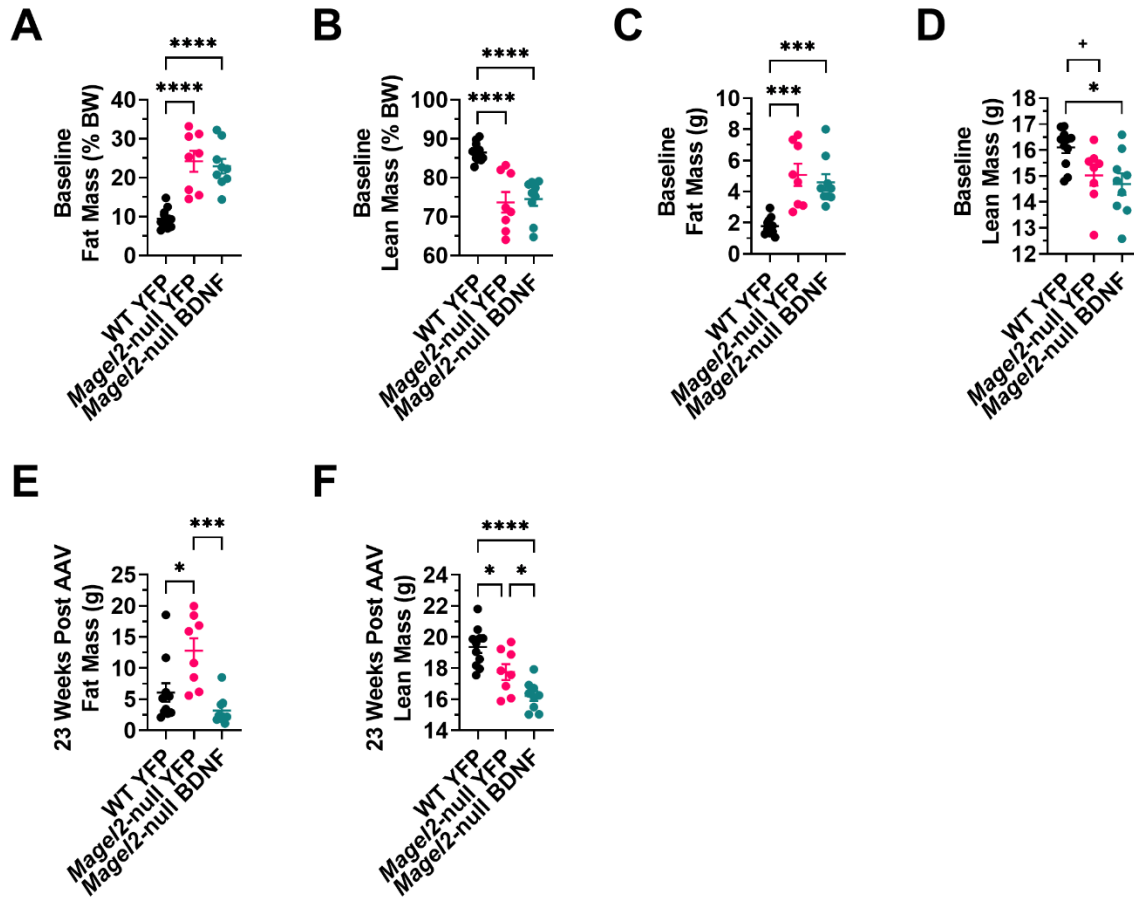

**Figure S1. Additional measures of body composition in female mice at baseline and endpoint.**

(A) Relative fat mass at baseline. (B) Relative lean mass at baseline. (C) Absolute fat mass at baseline. (D) Absolute lean mass at baseline. (E) Absolute fat mass at 23 weeks post AAV injection. (F) Absolute lean mass at 23 weeks post AAV injection. Data are means  $\pm$  SEM. Sample size: WT YFP n=11, *Mage12*-null YFP n=8, *Mage12*-null BDNF n=9. +  $P < 0.10$ , \*  $P < 0.05$ , \*\*\*  $P < 0.001$ , \*\*\*\*  $P < 0.0001$ .

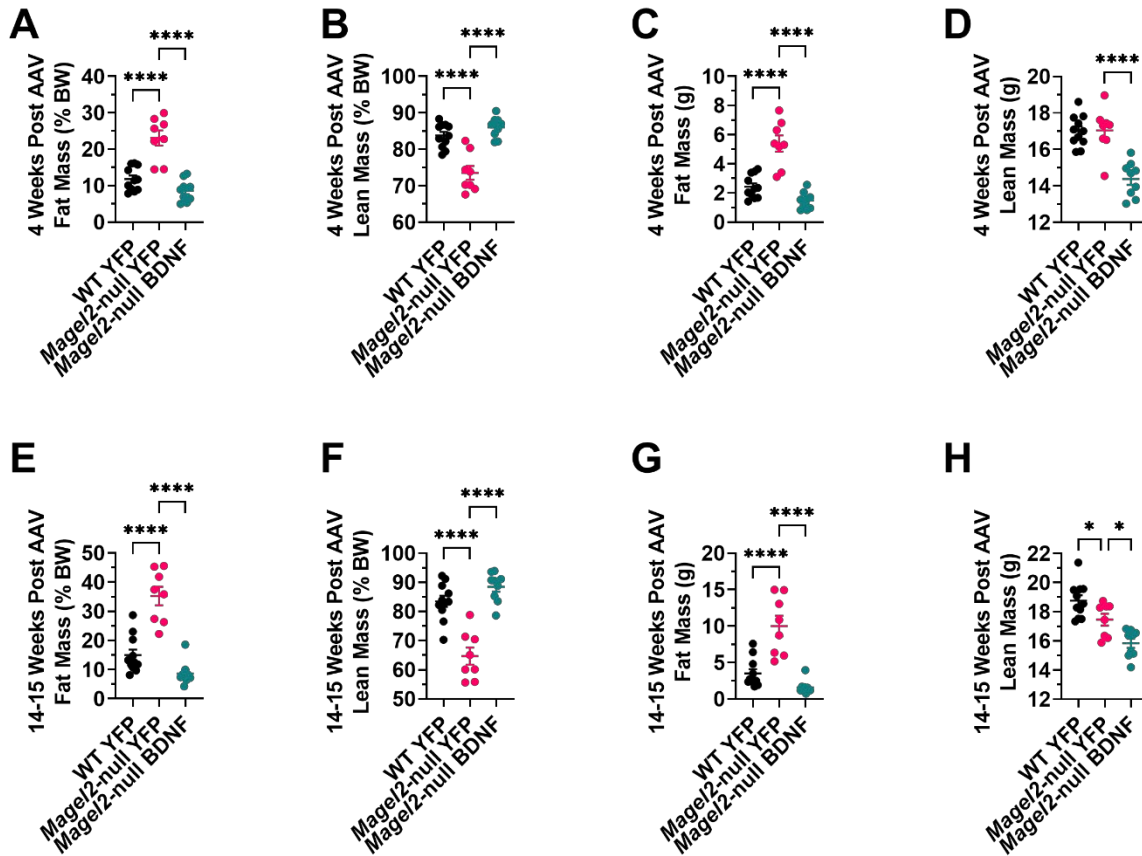

**Figure S2. Midpoint measurements of body composition in female mice.** (A) Relative fat mass at 4 weeks post AAV injection. (B) Relative lean mass at 4 weeks post AAV injection. (C) Absolute fat mass at 4 weeks post AAV injection. (D) Absolute lean mass at 4 weeks post AAV injection. (E) Relative fat mass between 14-15 weeks post AAV injection. (F) Relative lean mass between 14-15 weeks post AAV injection. (G) Absolute fat mass between 14-15 weeks post AAV injection. (H) Absolute lean mass between 14-15 weeks post AAV injection. Data are means  $\pm$  SEM. Sample size: WT YFP n=11, *Magel2*-null YFP n=8, *Magel2*-null BDNF n=9. \*  $P < 0.05$ , \*\*\*\*  $P < 0.0001$ .

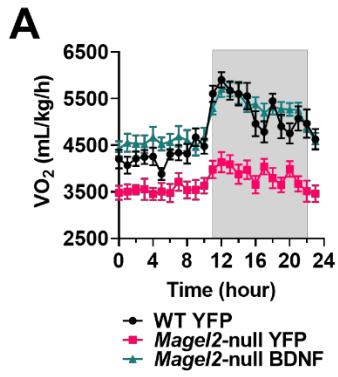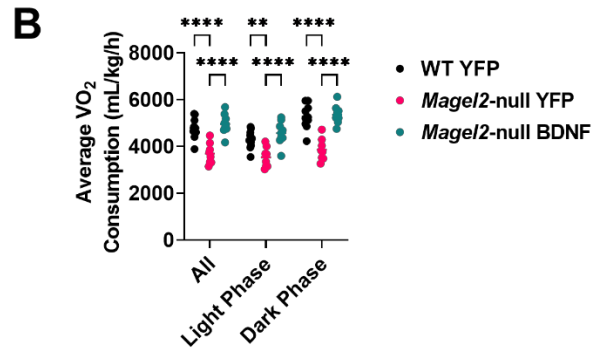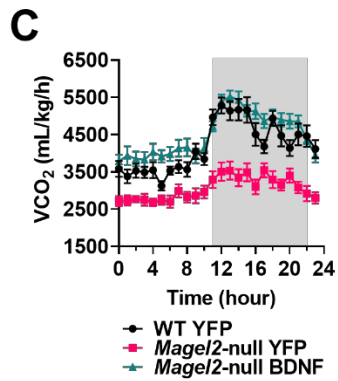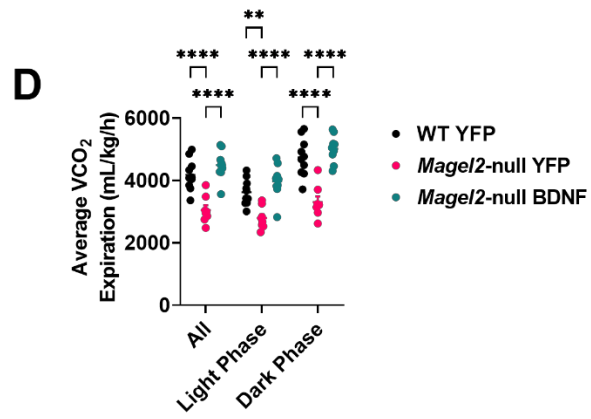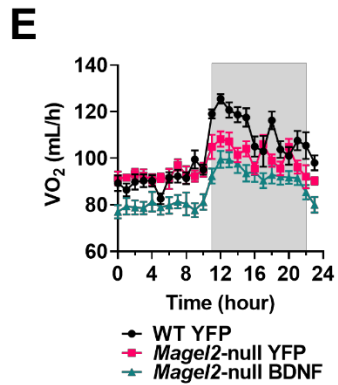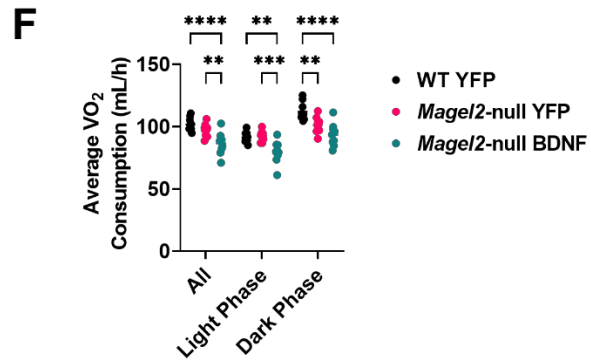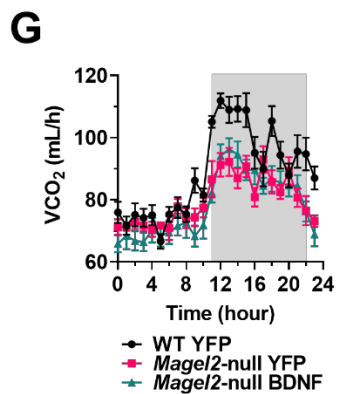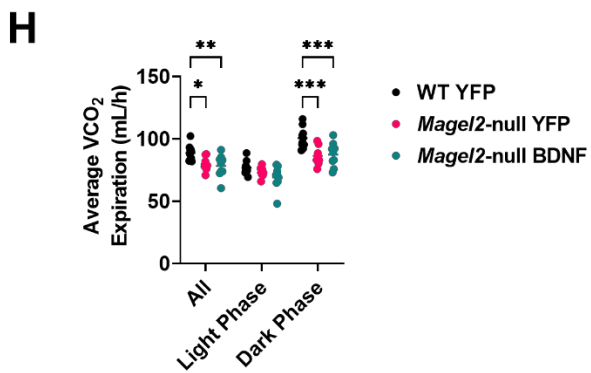

**Figure S3. Additional measures of indirect calorimetry in female mice.** (A) Volume of oxygen consumption over time as normalized to body weight. (B) Hourly oxygen consumption as normalized to body weight. (C) Volume of carbon dioxide expiration over time as normalized to body weight. (D) Hourly carbon dioxide expiration as normalized to body weight. (E) Absolute volume of oxygen consumption over time. (F) Hourly absolute volume of oxygen consumption. (G) Absolute volume of carbon dioxide expiration over time. (H) Hourly absolute volume of carbon dioxide expiration. Data are means  $\pm$  SEM. Sample size: WT YFP n=10, *Magel2*-null YFP n=8, *Magel2*-null BDNF n=9. Dark phases are denoted by shaded areas on indirect calorimetry time-course panels. \*  $P < 0.05$ , \*\*  $P < 0.01$ , \*\*\*  $P < 0.001$ , \*\*\*\*  $P < 0.0001$ .

**Table S1.** Primer sequences used for qPCR.

| <b>Gene</b>    | <b>Sequence</b>                                   |
|----------------|---------------------------------------------------|
| <i>Actinb</i>  | ACCCGCGAGCACAGCTT<br>ATATCGTCATCCATGGCGAACT       |
| <i>Adrb3</i>   | GGACGCTGTTTCCTTTAAAAGCA<br>TCCATCTCACCCCCCATGT    |
| <i>Adipoq</i>  | CCCTCCACCCAAGGGA<br>CCATTGTGGCCAGGATGTC           |
| <i>Agrp</i>    | GCGGAGGTGCTAGATCCA<br>AGGACTCGTGCAGCCTTA          |
| <i>BDNF</i>    | CCATAAGGACGCGGACTTGT<br>AGGCTCCAAAGGCACTTGACT     |
| <i>Crh</i>     | TGGCCCCAAGGAGGAAA<br>CCACTGCAGCTCCAAATAAAAA       |
| <i>Hprt1</i>   | TGTTGTTGGATATGCCCTTG<br>GCGCTCATCTTAGGCTTTGT      |
| <i>Hsl</i>     | GCGCCAGGACTGGAAAGAAT<br>TGAGAACGCTGAGGCTTTGAT     |
| <i>Insr</i>    | GGCTCTCCCCAGGAACTACA<br>GGTTCTGTCCAGGAGCCATT      |
| <i>Lep</i>     | ATTTACACACGCAGTCGGTAT<br>AGCCCAGGAATGAAGTCCAA     |
| <i>Mc4r</i>    | CACTGTGTCAGGCGTCTCTT<br>ATGGAAATGAGGCAGATGATGA    |
| <i>Obrb</i>    | AATGACGCAGGGCTGTATGT<br>TCAGGCTCCAGAAGAAGAGG      |
| <i>Pomc</i>    | GGCCTTTCCCCTAGAGTTCAA<br>GGACCTGCTCCAAGCCTAATG    |
| <i>Pparg1a</i> | AAGTGTGGA<br>GGGTTATCTTGGTTGGCTTTATG              |
| <i>Pten</i>    | TGGATTCGACTTAGACTTGACCT<br>GCGGTGTCATAATGTCTCTCAG |
| <i>TrkB-FL</i> | GACAATGCACGCAAGGACTT<br>AGTAGTCGGTGCTGTACACA      |
| <i>Vgf</i>     | GGGCGCCCCGATGT<br>TCAGCTACCTGCCATTATGC            |
